# Supplementary material
Source: PubMed Central journal article supplement (PMC4130243)

# Fragment based Library Generation for the Discovery of A Peptidomimetic p53-Mdm4 Inhibitor

André Boltjes,<sup>1</sup> Yijun, Huang,<sup>4</sup> Rob van de Velde,<sup>1</sup> Laurie Rijkee,<sup>1</sup> Siglinde Wolf,<sup>3</sup> James Gaugler,<sup>4</sup> Katarzyna Lesniak,<sup>2</sup> Katarzyna Guzik,<sup>2</sup> Tad A. Holak,<sup>2,3</sup> Alexander Dömling<sup>1,4\*</sup>

1. Drug Design, University of Groningen, A. Deusinglaan 1, 9713 AV Groningen, Netherlands
2. Faculty of Chemistry, Jagiellonian University, Ingardena 3, 30-060 Cracow, Poland
3. Max Planck Institute for Biochemistry, Am Klopferspitz 18, 82152 Martinsried, Germany
4. Department of Pharmaceutical Sciences, School of Pharmacy, University of Pittsburgh, 3501 Fifth Avenue, Pittsburgh, PA 15261, USA

\*Corresponding author: [a.s.s.domling@rug.nl](mailto:a.s.s.domling@rug.nl)

## SUPPORTING INFORMATION

### Methods

All reagents were purchased from commercial sources and used without further purification. Proton and carbon NMR spectra were determined on Bruker Avance™ 600 MHz NMR spectrometer. Chemical shifts are reported as  $\delta$  values in parts per million (ppm) as referenced to residual solvent. <sup>1</sup>H NMR spectra are tabulated as follows: chemical shift, number of protons,

multiplicity (s = singlet, br.s = broad singlet, d = doublet, t = triplet, q = quartet, m = multiplet), and coupling constant. High Resolution Mass spectra were obtained at the University of Pittsburgh Mass Spectrometry facility. LC-MS analysis was performed on an SHIMADZU instrument (reverse-phase HPLC coupled to electrospray ionization-mass spectrometry), using an analytical C18 column (Dionex Acclaim 120 Å, 2.1 × 50 mm, 3.0 µm) coupled to an Applied Biosystems API2000 mass spectrometer (ESI-MS). Acetonitrile/water mixtures were used as the mobile phase for reverse-phase HPLC, the flow rate was maintained at 0.2 mL/min. The column temperature was kept at 40 °C. The UV detection was at 254 nm.

**Table S1. Summary**

| Compound | Structure                                                                           | Mass (mg) | Yield (%) | LC/MS                                               |
|----------|-------------------------------------------------------------------------------------|-----------|-----------|-----------------------------------------------------|
| A1       | 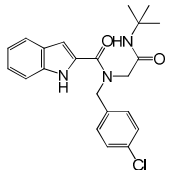   | 22.3      | 28        | $t_R = 11.61$ min; $m/z = 398.3$ [M+H] <sup>+</sup> |
| B1       |    | 20.6      | 24        | $t_R = 11.61$ min; $m/z = 424.2$ [M+H] <sup>+</sup> |
| C1       |    | 32.4      | 38        | $t_R = 11.48$ min; $m/z = 432.3$ [M+H] <sup>+</sup> |
| D1       |   | 15.6      | 18        | $t_R = 11.65$ min; $m/z = 446.2$ [M+H] <sup>+</sup> |
| E1       |  | 28.6      | 31        | $t_R = 12.01$ min; $m/z = 460.2$ [M+H] <sup>+</sup> |
| F1       |  | 34.7      | 42        | $t_R = 10.75$ min; $m/z = 414.3$ [M+H] <sup>+</sup> |
| G1       |  | 30.8      | 34        | $t_R = 10.63$ min; $m/z = 453.2$ [M+H] <sup>+</sup> |
| H1       |  | 19.7      | 19        | $t_R = 12.18$ min; $m/z = 508.2$ [M+H] <sup>+</sup> |
| A2       |  | 25.4      | 35        | $t_R = 11.18$ min; $m/z = 364.4$ [M+H] <sup>+</sup> |
| B2       |  | 30.1      | 39        | $t_R = 11.44$ min; $m/z = 390.4$ [M+H] <sup>+</sup> |

|    |                                                                                     |      |    |                                                        |
|----|-------------------------------------------------------------------------------------|------|----|--------------------------------------------------------|
| C2 | 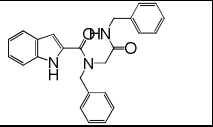   | 10.5 | 13 | $t_R = 11.10 \text{ min}; m/z = 398.4 \text{ [M+H]}^+$ |
| D2 |    | 12.3 | 15 | $t_R = 11.32 \text{ min}; m/z = 412.3 \text{ [M+H]}^+$ |
| E2 |    | 12.8 | 15 | $t_R = 11.66 \text{ min}; m/z = 426.4 \text{ [M+H]}^+$ |
| F2 |    | 27.6 | 36 | $t_R = 10.31 \text{ min}; m/z = 380.2 \text{ [M+H]}^+$ |
| G2 |    | 34.2 | 41 | $t_R = 10.44 \text{ min}; m/z = 419.4 \text{ [M+H]}^+$ |
| H2 |   | 19.1 | 20 | $t_R = 11.87 \text{ min}; m/z = 474.4 \text{ [M+H]}^+$ |
| A3 |  | 41.6 | 51 | $t_R = 11.78 \text{ min}; m/z = 412.2 \text{ [M+H]}^+$ |
| B3 |  | 23   | 26 | $t_R = 11.98 \text{ min}; m/z = 438.2 \text{ [M+H]}^+$ |
| C3 |  | 5.5  | 6  | $t_R = 11.65 \text{ min}; m/z = 446.3 \text{ [M+H]}^+$ |
| D3 |  | 7.4  | 8  | $t_R = 11.82 \text{ min}; m/z = 460.3 \text{ [M+H]}^+$ |
| E3 |  | 17.2 | 18 | $t_R = 12.15 \text{ min}; m/z = 474.3 \text{ [M+H]}^+$ |
| F3 |  | 30.2 | 35 | $t_R = 10.90 \text{ min}; m/z = 428.3 \text{ [M+H]}^+$ |

|    |                                                                                     |      |    |                                                        |
|----|-------------------------------------------------------------------------------------|------|----|--------------------------------------------------------|
| G3 | 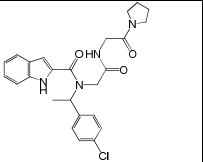   | 37.7 | 40 | $t_R = 10.40 \text{ min}; m/z = 467.4 \text{ [M+H]}^+$ |
| H3 |    | 10.4 | 10 | $t_R = 12.33 \text{ min}; m/z = 522.3 \text{ [M+H]}^+$ |
| A4 |    | 23.9 | 31 | $t_R = 11.24 \text{ min}; m/z = 382.2 \text{ [M+H]}^+$ |
| B4 |    | 12.4 | 15 | $t_R = 11.48 \text{ min}; m/z = 408.4 \text{ [M+H]}^+$ |
| C4 |   | 21.2 | 26 | $t_R = 11.16 \text{ min}; m/z = 416.3 \text{ [M+H]}^+$ |
| D4 |  | 10.7 | 12 | $t_R = 11.38 \text{ min}; m/z = 430.1 \text{ [M+H]}^+$ |
| E4 |  | 49.2 | 56 | $t_R = 11.69 \text{ min}; m/z = 444.4 \text{ [M+H]}^+$ |
| F4 |  | 30.5 | 38 | $t_R = 10.39 \text{ min}; m/z = 398.3 \text{ [M+H]}^+$ |
| G4 |  | 19   | 22 | $t_R = 10.31 \text{ min}; m/z = 437.4 \text{ [M+H]}^+$ |
| H4 |  | 19.5 | 20 | $t_R = 11.88 \text{ min}; m/z = 492.3 \text{ [M+H]}^+$ |
| A5 |  | 21.1 | 29 | $t_R = 11.79 \text{ min}; m/z = 370.5 \text{ [M+H]}^+$ |

|    |                                                                                     |      |    |                                                        |
|----|-------------------------------------------------------------------------------------|------|----|--------------------------------------------------------|
| B5 | 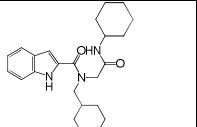   | 10.6 | 13 | $t_R = 11.97 \text{ min}; m/z = 396.5 \text{ [M+H]}^+$ |
| C5 |    | 18.3 | 23 | $t_R = 11.62 \text{ min}; m/z = 404.3 \text{ [M+H]}^+$ |
| D5 |    | 27.9 | 33 | $t_R = 11.84 \text{ min}; m/z = 418.2 \text{ [M+H]}^+$ |
| E5 |    | 27.4 | 32 | $t_R = 12.18 \text{ min}; m/z = 432.4 \text{ [M+H]}^+$ |
| F5 |    | 17.6 | 23 | $t_R = 10.82 \text{ min}; m/z = 386.3 \text{ [M+H]}^+$ |
| G5 |    | 14.5 | 17 | $t_R = 10.68 \text{ min}; m/z = 425.3 \text{ [M+H]}^+$ |
| H5 |  | 26.3 | 27 | $t_R = 12.34 \text{ min}; m/z = 480.4 \text{ [M+H]}^+$ |
| A6 |  | 26.9 | 38 | $t_R = 11.42 \text{ min}; m/z = 356.4 \text{ [M+H]}^+$ |
| B6 |  | 14.7 | 19 | $t_R = 11.63 \text{ min}; m/z = 382.2 \text{ [M+H]}^+$ |
| C6 |  | 28.8 | 37 | $t_R = 11.28 \text{ min}; m/z = 390.3 \text{ [M+H]}^+$ |
| D6 |  | 32.8 | 41 | $t_R = 11.51 \text{ min}; m/z = 404.2 \text{ [M+H]}^+$ |
| E6 |  | 33   | 40 | $t_R = 11.88 \text{ min}; m/z = 418.5 \text{ [M+H]}^+$ |
| F6 |  | 23.7 | 32 | $t_R = 10.43 \text{ min}; m/z = 372.3 \text{ [M+H]}^+$ |

|    |  |      |    |                                                |
|----|--|------|----|------------------------------------------------|
| G6 |  | 21   | 26 | $t_R = 10.34 \text{ min}; m/z = 411.4 [M+H]^+$ |
| H6 |  | 25.1 | 27 | $t_R = 12.07 \text{ min}; m/z = 466.5 [M+H]^+$ |
| A7 |  | 7.2  | 11 | $t_R = 11.23 \text{ min}; m/z = 330.5 [M+H]^+$ |
| B7 |  | 11.8 | 17 | $t_R = 11.44 \text{ min}; m/z = 356.2 [M+H]^+$ |
| C7 |  | 15.7 | 22 | $t_R = 10.98 \text{ min}; m/z = 364.3 [M+H]^+$ |
| D7 |  | 14.8 | 20 | $t_R = 11.22 \text{ min}; m/z = 378.4 [M+H]^+$ |
| E7 |  | 28.8 | 37 | $t_R = 11.58 \text{ min}; m/z = 392.3 [M+H]^+$ |
| F7 |  | 35   | 51 | $t_R = 9.95 \text{ min}; m/z = 346.3 [M+H]^+$  |
| G7 |  | 22.1 | 29 | $t_R = 9.90 \text{ min}; m/z = 385.3 [M+H]^+$  |
| H7 |  | 16.6 | 19 | $t_R = 11.81 \text{ min}; m/z = 440.4 [M+H]^+$ |
| A8 |  | 8.3  | 13 | $t_R = 10.30 \text{ min}; m/z = 332.2 [M+H]^+$ |
| B8 |  | 13.5 | 19 | $t_R = 10.60 \text{ min}; m/z = 358.5 [M+H]^+$ |
| C8 |  | 9.6  | 13 | $t_R = 10.32 \text{ min}; m/z = 366.2 [M+H]^+$ |
| D8 |  | 14.9 | 20 | $t_R = 10.56 \text{ min}; m/z = 380.3 [M+H]^+$ |

|     |                                                                                     |      |    |                                                |
|-----|-------------------------------------------------------------------------------------|------|----|------------------------------------------------|
| E8  | 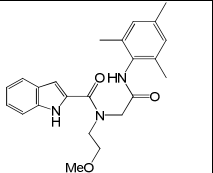   | 36.5 | 46 | $t_R = 10.92 \text{ min}; m/z = 394.3 [M+H]^+$ |
| F8  |    | 30.1 | 43 | $t_R = 9.35 \text{ min}; m/z = 448.3 [M+H]^+$  |
| G8  |    | 32.6 | 42 | $t_R = 9.28 \text{ min}; m/z = 387.2 [M+H]^+$  |
| H8  |    | 19.1 | 22 | $t_R = 11.48 \text{ min}; m/z = 442.3 [M+H]^+$ |
| A9  |    | 21.7 | 33 | $t_R = 10.80 \text{ min}; m/z = 328.4 [M+H]^+$ |
| B9  |    | 17.8 | 25 | $t_R = 11.03 \text{ min}; m/z = 354.3 [M+H]^+$ |
| C9  |   | 13.8 | 19 | $t_R = 10.73 \text{ min}; m/z = 362.3 [M+H]^+$ |
| D9  |  | 9.4  | 13 | $t_R = 10.93 \text{ min}; m/z = 376.4 [M+H]^+$ |
| E9  |  | 29.4 | 38 | $t_R = 11.32 \text{ min}; m/z = 390.4 [M+H]^+$ |
| F9  |  | 35.2 | 51 | $t_R = 9.84 \text{ min}; m/z = 344.5 [M+H]^+$  |
| G9  |  | 25.8 | 34 | $t_R = 9.75 \text{ min}; m/z = 383.2 [M+H]^+$  |
| H9  |  | 15.1 | 17 | $t_R = 11.58 \text{ min}; m/z = 438.4 [M+H]^+$ |
| A10 |  | 30.2 | 34 | $t_R = 11.68 \text{ min}; m/z = 442.1 [M+H]^+$ |



|     |                                                                                     |      |    |                                                        |
|-----|-------------------------------------------------------------------------------------|------|----|--------------------------------------------------------|
| B10 | 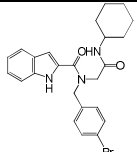   | 29.1 | 31 | $t_R = 11.91 \text{ min}; m/z = 468.3 \text{ [M+H]}^+$ |
| C10 |    | 44.9 | 47 | $t_R = 11.58 \text{ min}; m/z = 476.2 \text{ [M+H]}^+$ |
| D10 |    | 24.3 | 25 | $t_R = 11.76 \text{ min}; m/z = 490.2 \text{ [M+H]}^+$ |
| E10 |    | 28.7 | 29 | $t_R = 12.11 \text{ min}; m/z = 504.3 \text{ [M+H]}^+$ |
| F10 |    | 28.3 | 31 | $t_R = 10.88 \text{ min}; m/z = 458.2 \text{ [M+H]}^+$ |
| G10 |   | 25.8 | 26 | $t_R = 10.73 \text{ min}; m/z = 497.1 \text{ [M+H]}^+$ |
| H10 |  | 17.9 | 16 | $t_R = 12.27 \text{ min}; m/z = 552.3 \text{ [M+H]}^+$ |
| A11 |  | 12.1 | 14 | $t_R = 11.93 \text{ min}; m/z = 432.0 \text{ [M+H]}^+$ |
| B11 |  | 51.4 | 56 | $t_R = 12.13 \text{ min}; m/z = 458.4 \text{ [M+H]}^+$ |
| C11 |  | 17.8 | 19 | $t_R = 11.80 \text{ min}; m/z = 466.3 \text{ [M+H]}^+$ |
| D11 |  | 22   | 23 | $t_R = 11.98 \text{ min}; m/z = 480.3 \text{ [M+H]}^+$ |

|     |                                                                                     |      |    |                                                        |
|-----|-------------------------------------------------------------------------------------|------|----|--------------------------------------------------------|
| E11 | 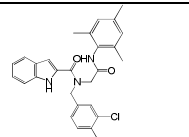   | 33.7 | 34 | $t_R = 12.28 \text{ min}; m/z = 494.2 \text{ [M+H]}^+$ |
| F11 |    | 38   | 42 | $t_R = 11.06 \text{ min}; m/z = 448.1 \text{ [M+H]}^+$ |
| G11 |    | 30.2 | 31 | $t_R = 10.91 \text{ min}; m/z = 487.2 \text{ [M+H]}^+$ |
| H11 |    | 22.4 | 21 | $t_R = 12.47 \text{ min}; m/z = 542.3 \text{ [M+H]}^+$ |
| A12 |    | 28.9 | 38 | $t_R = 11.32 \text{ min}; m/z = 378.3 \text{ [M+H]}^+$ |
| B12 |    | 28.5 | 35 | $t_R = 11.55 \text{ min}; m/z = 404.3 \text{ [M+H]}^+$ |
| C12 |   | 14.2 | 17 | $t_R = 11.23 \text{ min}; m/z = 412.2 \text{ [M+H]}^+$ |
| D12 |  | 41.7 | 49 | $t_R = 11.43 \text{ min}; m/z = 426.3 \text{ [M+H]}^+$ |
| E12 |  | 48.2 | 55 | $t_R = 11.76 \text{ min}; m/z = 440.3 \text{ [M+H]}^+$ |
| F12 |  | 19.9 | 25 | $t_R = 10.48 \text{ min}; m/z = 394.2 \text{ [M+H]}^+$ |
| G12 |  | 21   | 24 | $t_R = 10.34 \text{ min}; m/z = 433.3 \text{ [M+H]}^+$ |
| H12 |  | 31.3 | 32 | $t_R = 11.96 \text{ min}; m/z = 488.3 \text{ [M+H]}^+$ |

| Compound | Structure                                                                           | Mass (mg) | Yield (%) |
|----------|-------------------------------------------------------------------------------------|-----------|-----------|
| I1       | 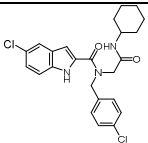   | 284       | 62        |
| J1       |    | 106       | 24        |
| K1       |    | 287       | 66        |
| M1       |    | 140       | 33        |
| N1       |    | 147       | 35        |
| O1       |   | 213       | 49        |
| P1       |  | 132       | 30        |
| Q1       |  | 163       | 36        |
| R1       |  | 366       | 79        |
| S1       |  | 157       | 36        |
| T1       |  | 230       | 53        |

|     |  |     |    |
|-----|--|-----|----|
| U1  |  | 299 | 69 |
| V1  |  | 241 | 51 |
| I13 |  | 246 | 50 |
| J13 |  | 16  | 3  |
| K13 |  | 339 | 72 |
| O13 |  | 203 | 43 |
| W13 |  | 301 | 66 |
| I14 |  | 299 | 68 |
| J14 |  | 41  | 10 |
| K14 |  | 169 | 40 |
| L14 |  | 168 | 40 |

|     |                                                                                     |     |    |
|-----|-------------------------------------------------------------------------------------|-----|----|
| M14 | 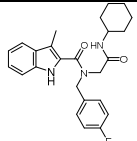   | 239 | 22 |
| N14 |    | 281 | 69 |
| P14 |    | 22  | 5  |
| Q14 |    | 72  | 17 |
| R14 |    | 176 | 39 |
| S14 |   | 239 | 57 |
| T14 |  | 231 | 55 |
| U14 |  | 30  | 7  |
| W14 |  | 191 | 47 |
| I15 |  | 310 | 68 |
| J15 |  | 191 | 40 |

|     |                                                                                   |     |    |
|-----|-----------------------------------------------------------------------------------|-----|----|
| K15 | 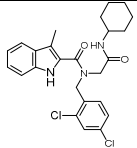 | 315 | 67 |
| M15 |  | 175 | 38 |
| N15 |  | 292 | 64 |
| O15 |  | 285 | 60 |
| W15 |  | 258 | 56 |

## Characterization of selected compounds

### *N*-(4-chlorobenzyl)-*N*-(2-(cyclohexylamino)-2-oxoethyl)-1*H*-indole-2-carboxamide (**B1**):

HRMS: C<sub>24</sub>H<sub>26</sub>N<sub>3</sub>O<sub>2</sub>ClNa, 446.1611 (calcd.), 446.1634 (found).

<sup>1</sup>H NMR (600 MHz, DMSO): 1.18-1.27 (m, 5H), 1.53-1.74 (m, 4H), 3.58 (m, 1H), 3.94 (m, 1H), 4.18 (m, 1H), 4.66 (m, 1H), 5.00 (m, 1H), 6.53 (m, 1H), 6.75 (m, 1H), 7.03 (m, 1H), 7.18 (m, 1H), 7.37-7.56 (m, 4H), 7.84 (m, 1H), 8.05 (m, 1H), 11.70 (m, 1H).

<sup>13</sup>C NMR (150 MHz, DMSO): 24.4, 25.1, 32.2, 47.5, 49.7, 51.2, 54.9, 103.9, 111.99, 112.04, 119.8, 121.4, 123.5, 126.8, 128.3, 129.8, 131.8, 135.9, 136.3, 163.8, 166.9.

### *N*-(*tert*-butyl)-*N*-(2-(cyclohexylamino)-2-oxoethyl)-1*H*-indole-2-carboxamide (**B7**):

HRMS: C<sub>21</sub>H<sub>29</sub>N<sub>3</sub>O<sub>2</sub>Na, 378.2157 (calcd.), 378.2140 (found).

<sup>1</sup>H NMR (600 MHz, DMSO): 1.13-1.21 (m, 3H), 1.27-1.33 (m, 2H), 1.46 (s, 9H), 1.55-1.57 (m, 1H), 1.68-1.70 (m, 2H), 1.77-1.79 (m, 2H), 3.63-3.66 (m, 1H), 4.21 (s, 2H), 6.67 (s, 1H), 7.00-7.02 (t, 1H, J = 7.2Hz), 7.14-7.16 (t, 1H, J = 7.5 Hz), 7.37-7.38 (d, 2H, J = 8.4Hz), 7.53-7.54 (d, 1H, J = 8.4Hz), 7.93-7.94 (d, 1H, J = 7.8Hz), 11.52 (s, 1H).

<sup>13</sup>C NMR (150 MHz, DMSO): 24.9, 25.7, 28.0, 32.6, 48.0, 50.6, 58.0, 100.0, 103.3, 112.4, 120.0, 121.7, 123.4, 127.2, 133.2, 136.2, 166.0, 169.9.

### *N*-(2-(benzylamino)-2-oxoethyl)-*N*-(*tert*-butyl)-1*H*-indole-2-carboxamide (**C7**):

HRMS: C<sub>22</sub>H<sub>25</sub>N<sub>3</sub>O<sub>2</sub>Na, 386.1844 (calcd.), 386.1812 (found).

<sup>1</sup>H NMR (600 MHz, DMSO): 1.47 (s, 9H), 4.32 (s, 2H), 4.37-4.38 (d, 2H), 6.60 (s, 1H), 7.02 (m, 1H), 7.15 (m, 1H), 7.26-7.39 (m, 5H), 7.37-7.39 (d, 1H, J = 8.4Hz), 7.47-7.48 (d, 1H, J = 8.4Hz), 8.58-8.60 (t, 1H, J = 6.0Hz), 11.51 (s, 1H).

<sup>13</sup>C NMR (150 MHz, DMSO): 28.0, 42.8, 50.7, 58.0, 103.1, 112.4, 120.1, 121.7, 123.4, 127.2, 127.4, 127.9, 128.8, 133.0, 136.2, 139.8, 165.9, 170.9.

***N-(tert-butyl)-N-(2-(mesitylamino)-2-oxoethyl)-1H-indole-2-carboxamide (E7):***

HRMS: C<sub>24</sub>H<sub>30</sub>N<sub>3</sub>O<sub>2</sub>, 392.2338 (calcd.), 392.2341 (found).

<sup>1</sup>H NMR (600 MHz, DMSO): 1.29 (s, 9H), 1.90 (s, 6H), 2.00 (s, 3H), 4.27 (s, 2H), 6.52 (s, 1H), 6.67 (s, 2H), 6.78-6.81 (t, 1H, J = 7.2Hz), 6.92-6.95 (t, 1H, J = 7.2Hz), 7.16-7.17 (d, 1H, J = 8.4Hz), 7.26-7.28 (d, 1H, J = 8.4Hz), 9.16 (s, 1H), 11.29 (s, 1H).

<sup>13</sup>C NMR (150 MHz, DMSO): 17.9, 20.5, 27.5, 57.5, 62.8, 102.7, 111.9, 119.7, 121.0, 123.0, 126.7, 128.6, 131.9, 132.6, 134.8, 135.6, 135.8, 165.5, 169.3.

***N-(2-(cyclohexylamino)-2-oxoethyl)-N-phenethyl-1H-indole-2-carboxamide (B12):***

HRMS: C<sub>25</sub>H<sub>30</sub>N<sub>3</sub>O<sub>2</sub>, 404.2338 (calcd.), 404.2328 (found).

<sup>1</sup>H NMR (600 MHz, DMSO): 1.13-1.29 (m, 6H), 1.55-1.57 (d, 1H, J = 12.6Hz), 1.68-1.70 (m, 2H), 1.75-1.77 (d, 2H, J = 12.0Hz), 2.92 (s, 2H), 3.03 (s, 1H), 3.64 (s, 1H), 3.89 (m, 1H), 4.09 (s, 1H), 4.24 (s, 1H), 6.68 (s, 1H), 7.03-7.05 (t, 1H, J = 7.32Hz), 7.18-7.26 (m, 2H), 7.26-7.36 (m, 4H), 7.42-7.44 (d, 1H, J = 8.4Hz), 7.57 (m, 1H), 8.11 (m, 1H), 11.64 (s, 1H).

<sup>13</sup>C NMR (150 MHz, DMSO): 24.5, 25.2, 32.3, 41.3, 47.6, 49.6, 52.0, 103.5, 112.0, 119.7, 121.3, 123.3, 126.2, 126.9, 128.5, 128.7, 135.8, 163.3, 167.4.



# HPLC/MS Analysis

*N*-(4-chlorobenzyl)-*N*-(2-(cyclohexylamino)-2-oxoethyl)-1*H*-indole-2-carboxamide (B1):

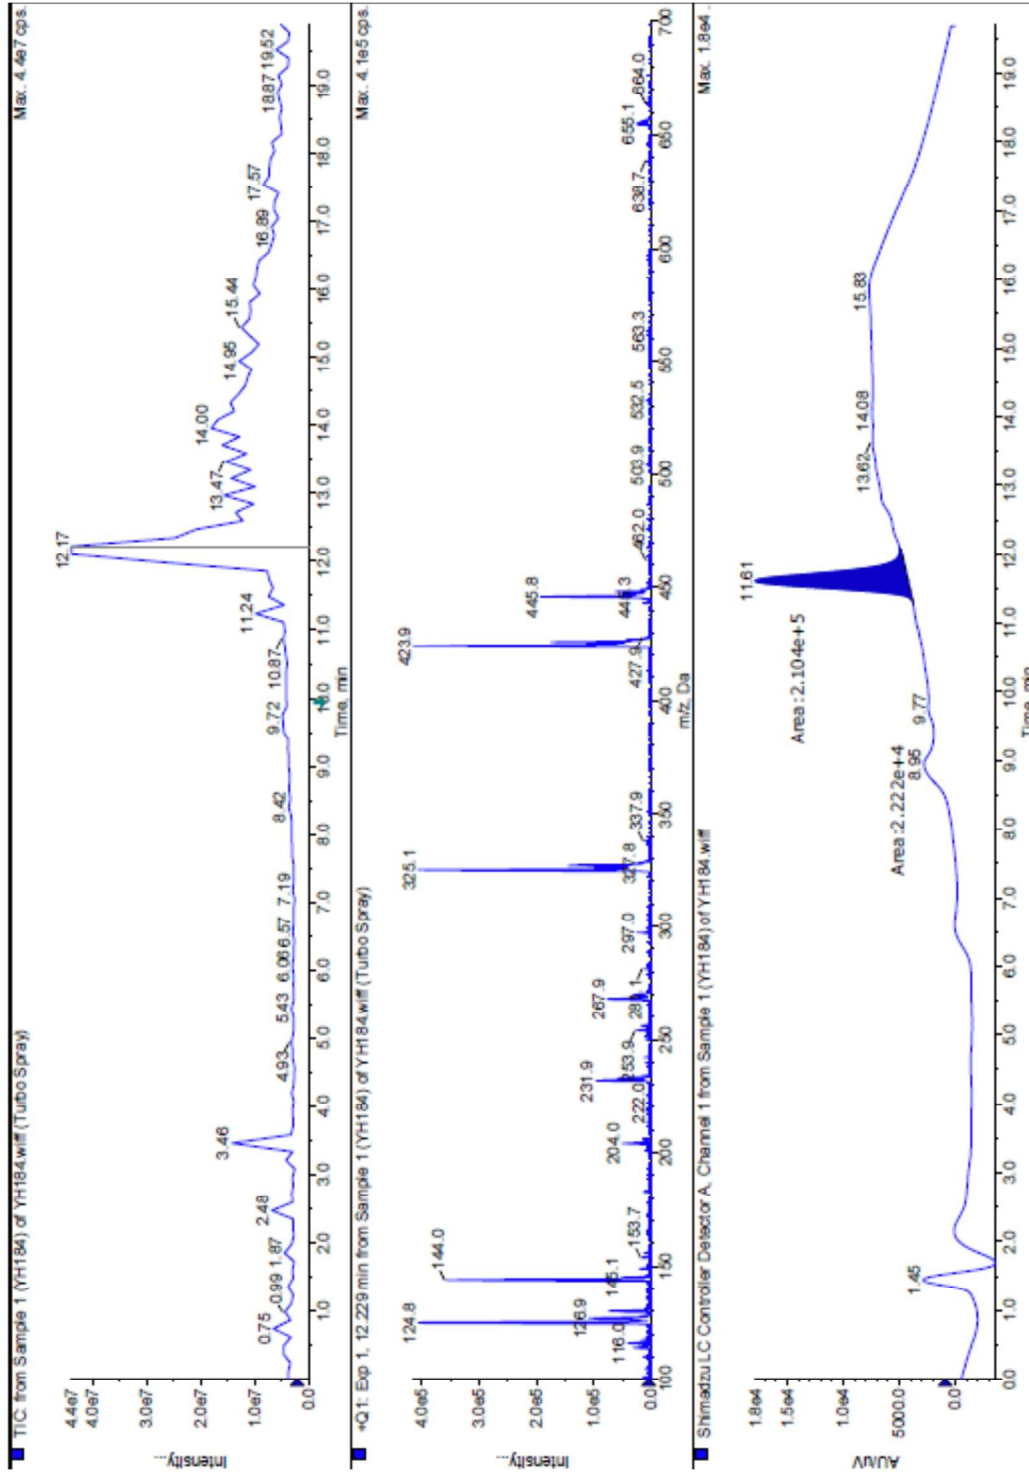

*N*-(*tert*-butyl)-*N*-(2-(cyclohexylamino)-2-oxoethyl)-1*H*-indole-2-carboxamide (B7):

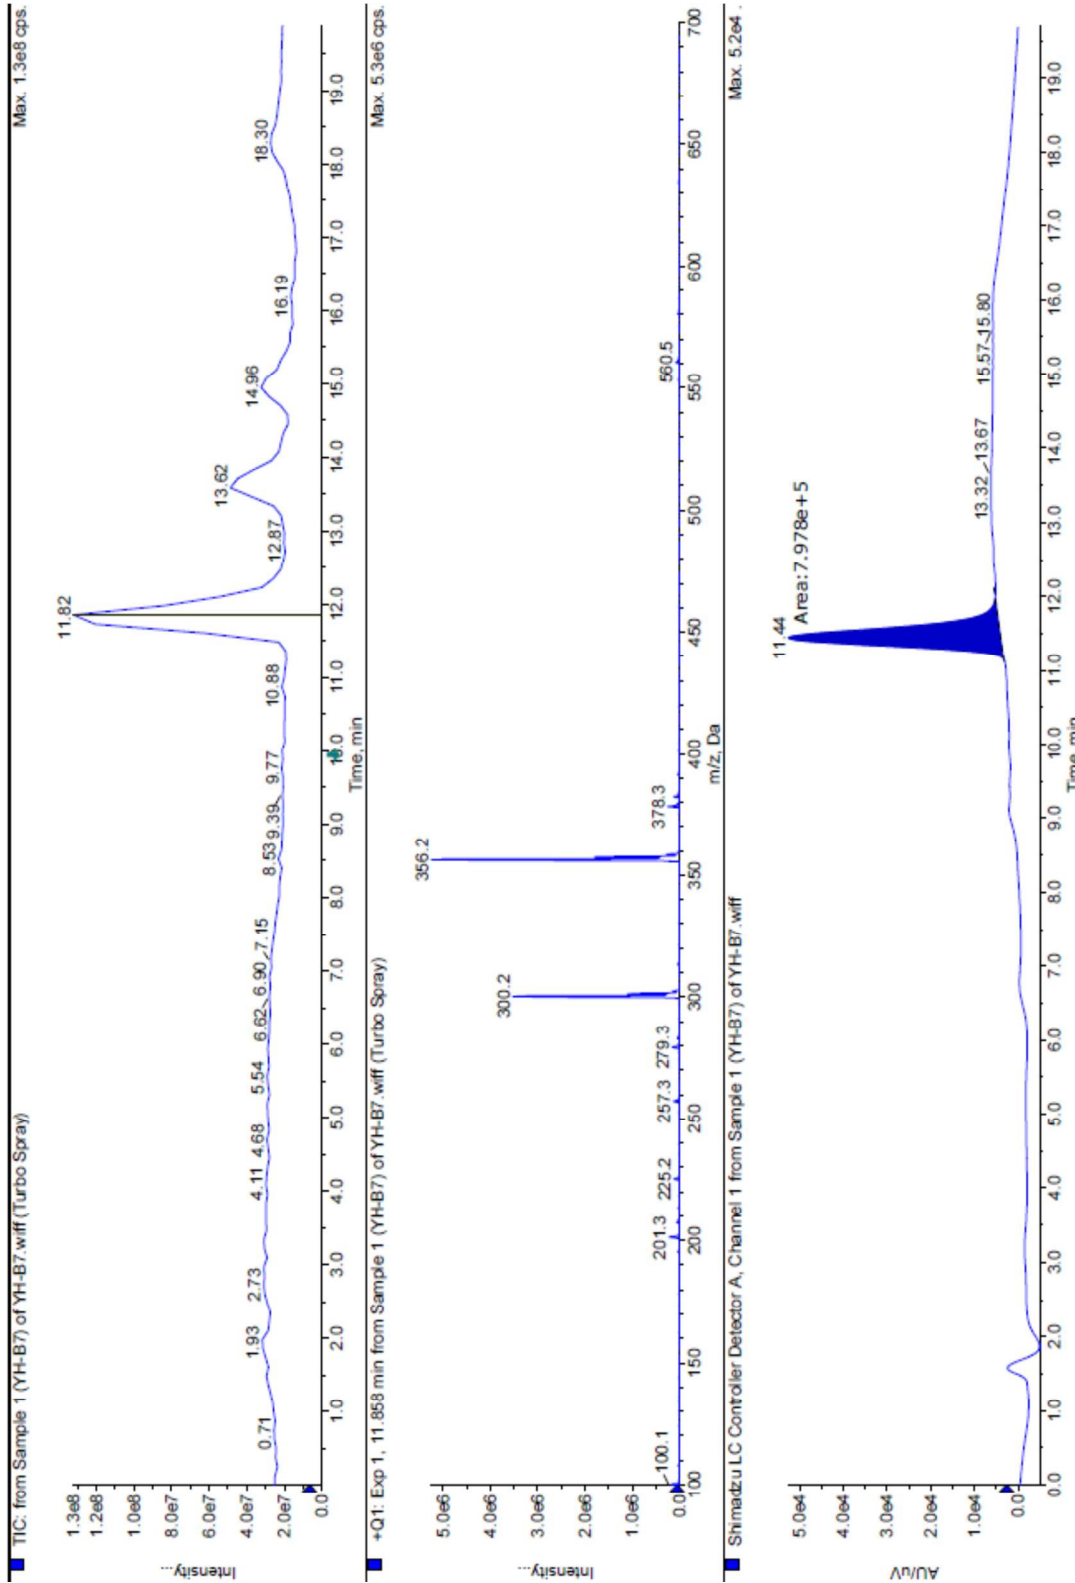

*N*-(2-(benzylamino)-2-oxoethyl)-*N*-(*tert*-butyl)-1*H*-indole-2-carboxamide (C7):

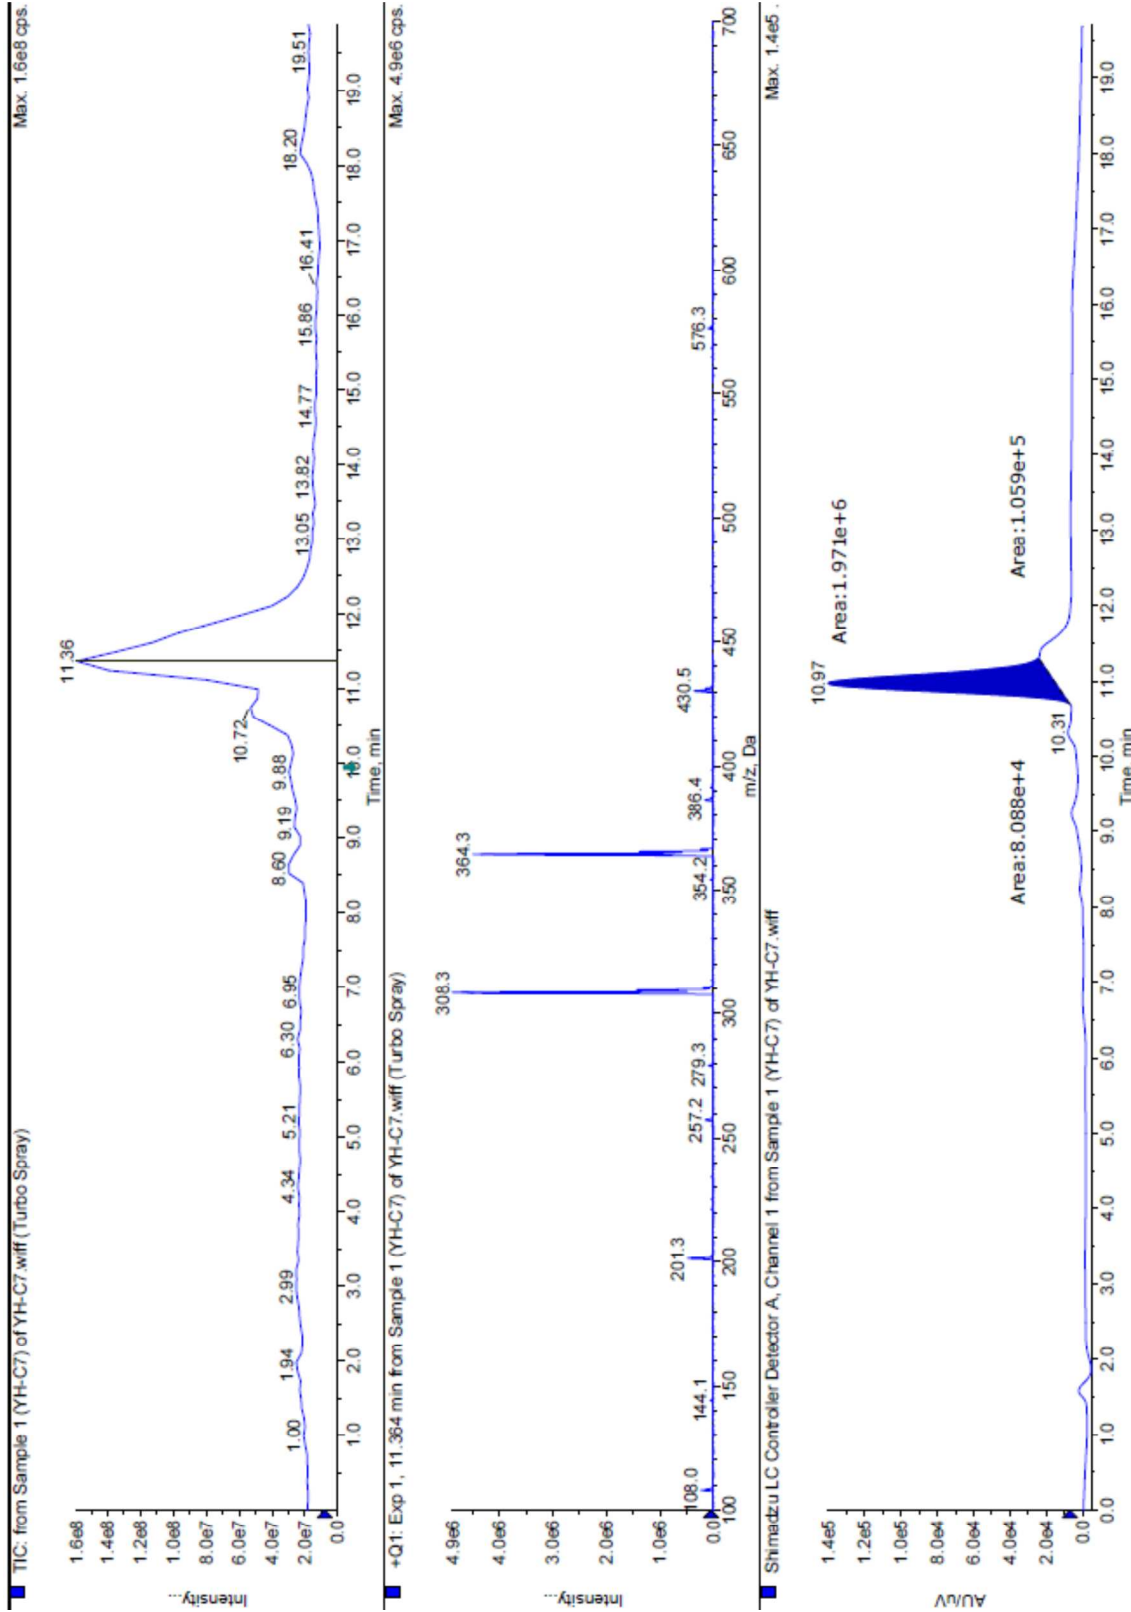

*N*-(*tert*-butyl)-*N*-(2-(*mesitylamino*)-2-oxoethyl)-1*H*-indole-2-carboxamide (E7):

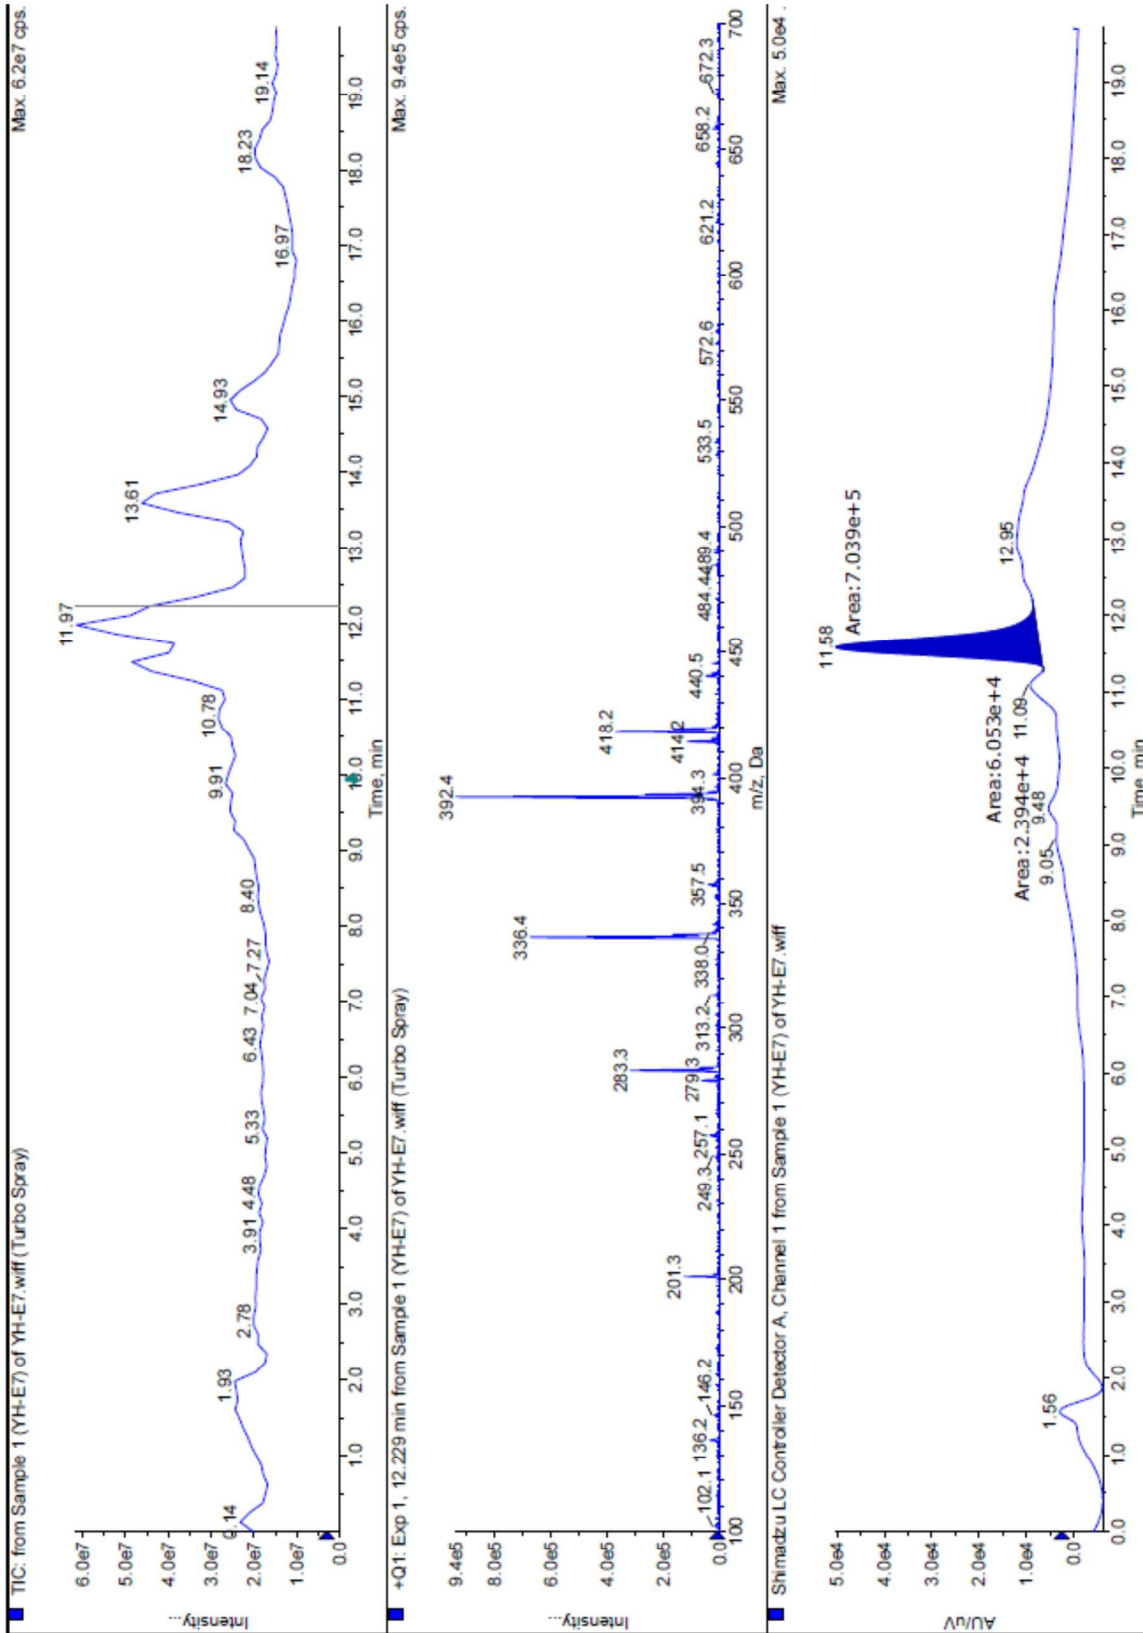

*N*-(2-(cyclohexylamino)-2-oxoethyl)-*N*-phenethyl-1*H*-indole-2-carboxamide (B12):

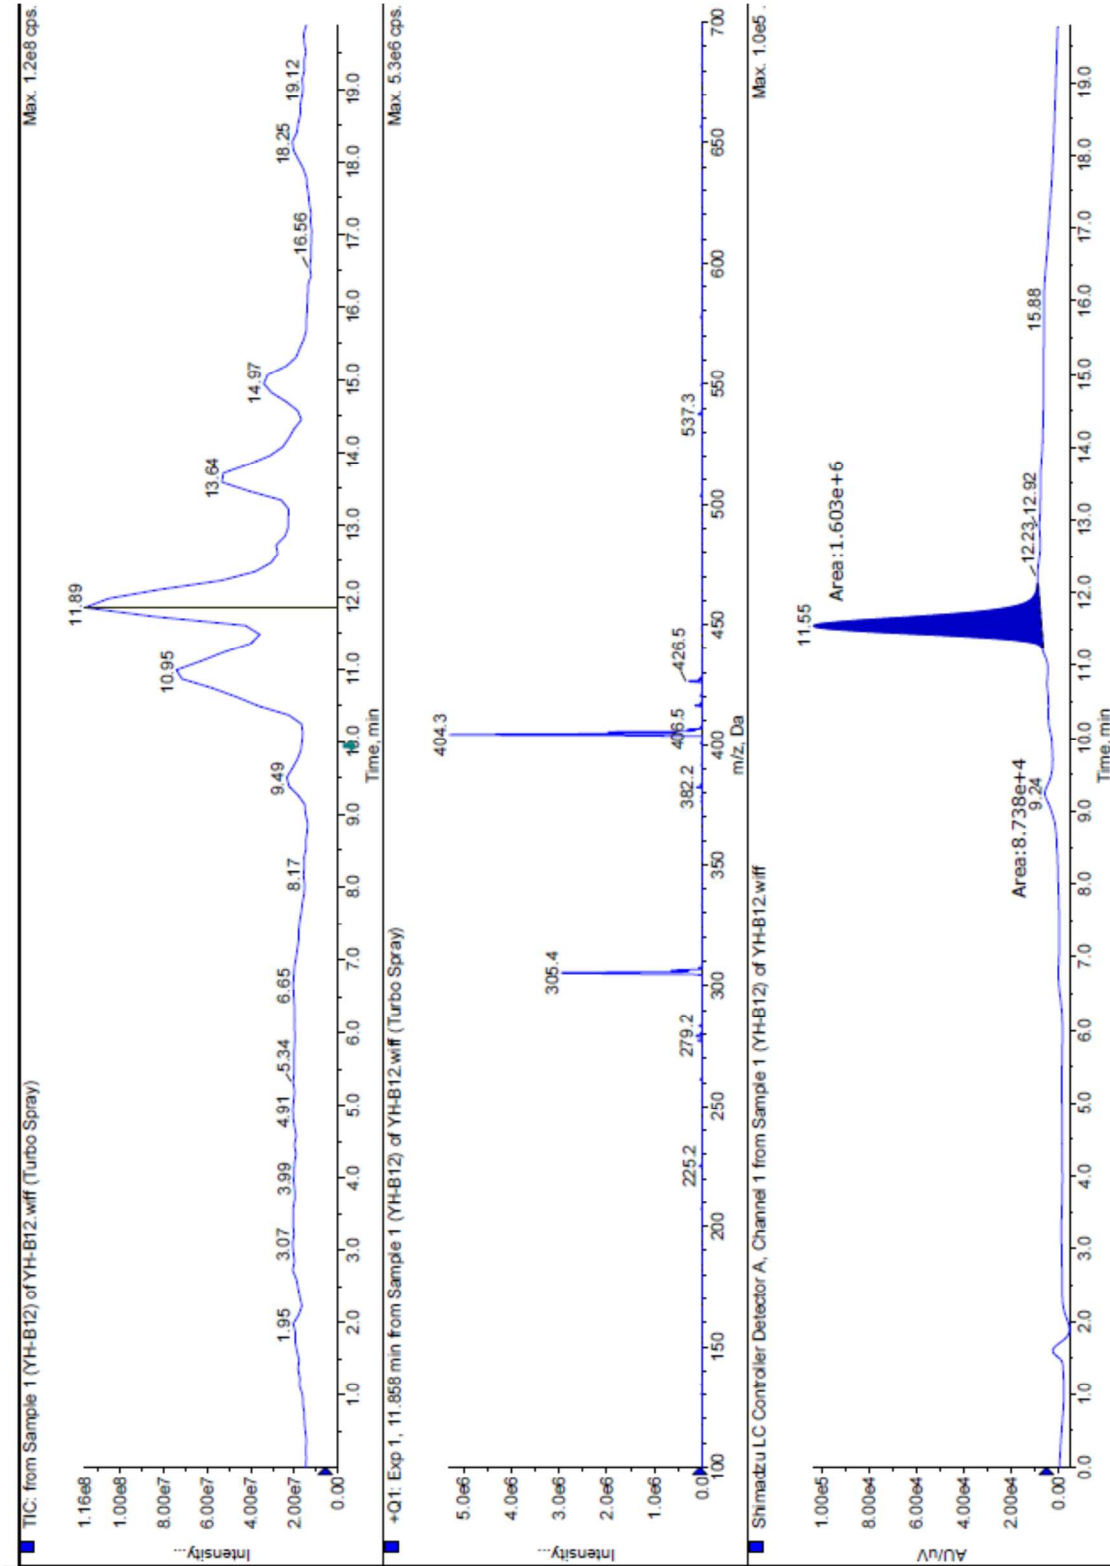

Supplement: co500026b_si_001.pdf [file co500026b_si_001.pdf]
